# Supplementary material
Source: Springer Nature journal article supplement (https://www.springermedizin.de/resource/supplementary/12936_2014_3366_MOESM3_ESM.pdf/9545740)
Supplement: MOESM3 [file 9545740]

Additional file 3: Hierarchical classification of Gene Ontology terms enriched during the transcriptomic experiment.

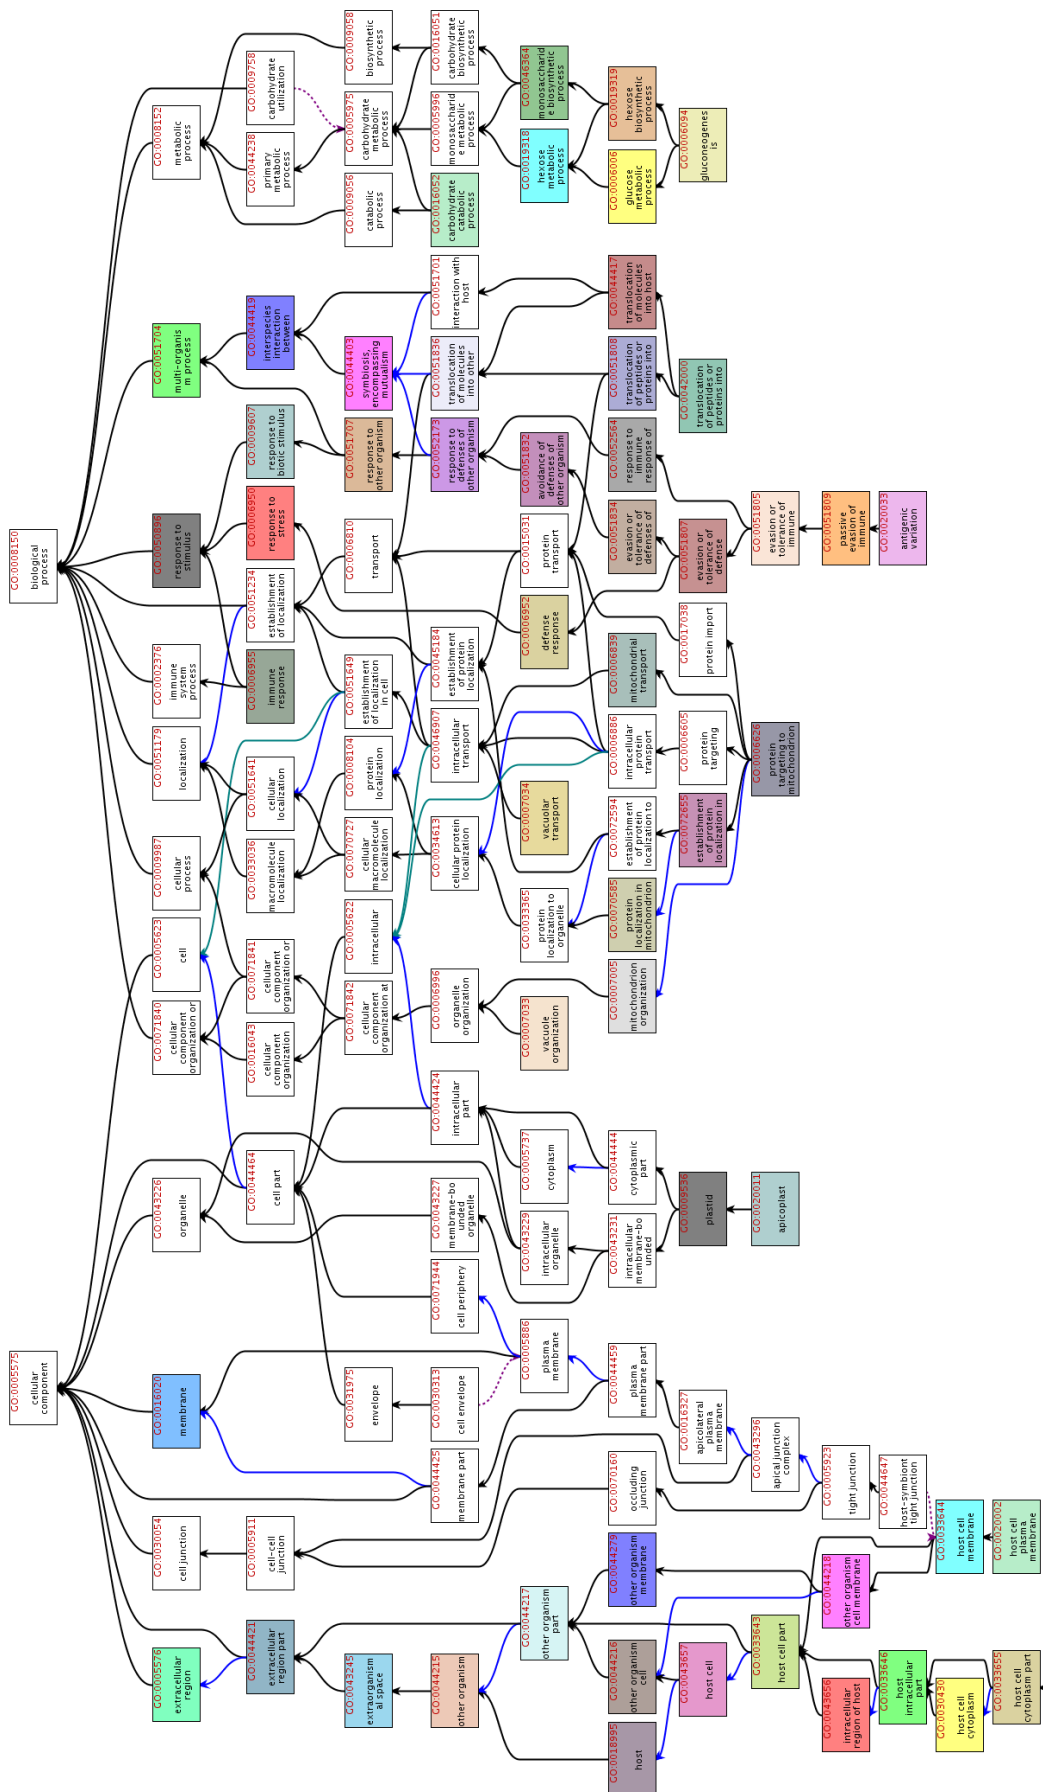

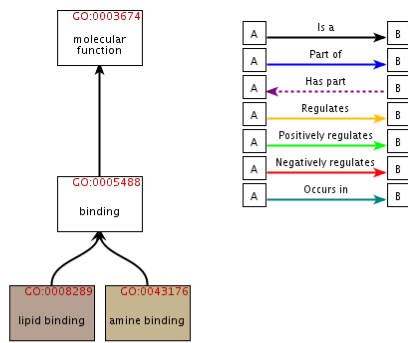

QuickGO was used to produce this Ancestral Chart representing significantly overrepresented GOs. This graph is divided into three groups: biological process, cellular component and molecular function.
